# Supplementary material for: A nanosol SERS/RRS aptamer assay of trace cobalt(ii) by covalent organic framework BtPD-loaded nanogold catalytic amplification
Source: Royal Society of Chemistry journal article supplement (doi:10.1039/d1na00208b), 2021-01-01
Supplement: d1na00208b1.pdf [file d1na00208b1.pdf]

## Nanosol SERS/RRS aptamer assay of trace cobalt (II) by covalent organic framework BtPD-loaded nanogold catalytic amplification

Guiqing Wen, Yang Xiao, Shuxin Chen, Xinghui Zhang, Zhiliang Jiang\*

Key Laboratory of Ecology of Rare and Endangered Species and Environmental Protection (Guangxi Normal University), Ministry of Education, Guangxi, Key Laboratory of Environmental Pollution Control Theory and Technology, Guilin 541004, China.

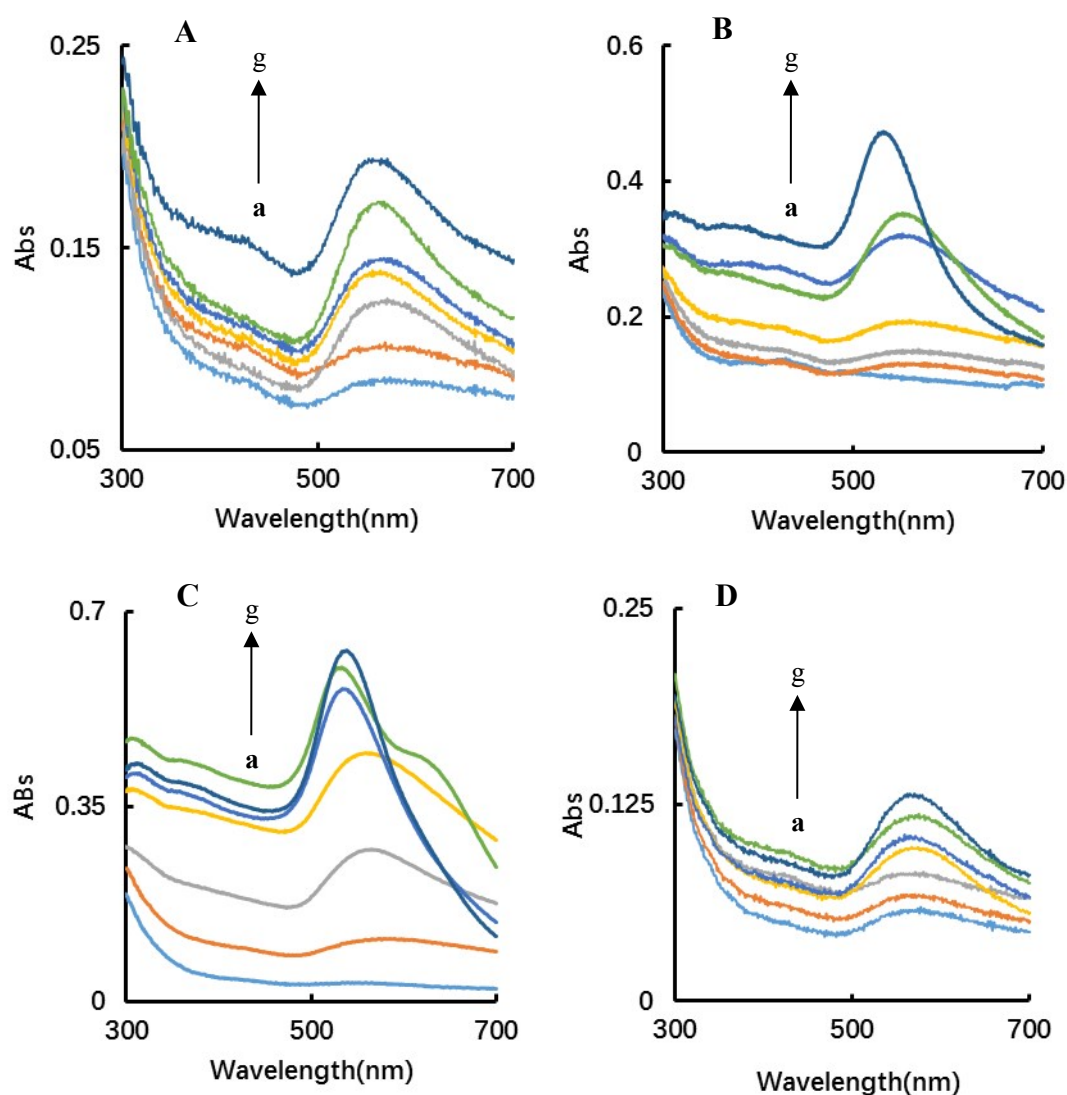

**Fig. S1 Absorption spectra of the catalytic system**

**A:** a: 0.067 mg/mL  $\text{HAuCl}_4$ +0.67 mmol/L  $\text{HCl}$ +3 mmol/L  $\text{CHO}_2\text{Na}$ ; b-g: a+0.044, 0.089, 0.134, 0.179, 0.223, 0.268  $\mu\text{g/mL}$  BtPD.

**B:** a: 0.067 mg/mL  $\text{HAuCl}_4$ +0.67 mmol/L  $\text{HCl}$ +3 mmol/L  $\text{CHO}_2\text{Na}$ ; b-g: a+0.044, 0.089,

0.134, 0.179, 0.223, 0.268  $\mu\text{g/mL}$  AuBtPD.

**C:** 0.067 mg/mL  $\text{HAuCl}_4$ +0.67 mmol/L HCl + 3 mmol/L  $\text{CHO}_2\text{Na}$ ; b-g: a+0.065, 0.129, 0.194, 0.259, 0.323, 0.388  $\mu\text{g/mL}$  AuNPs.

**D:** a: 0.064 mg/mL  $\text{HAuCl}_4$ +0.67 mmol/L HCl + 3 mmol/L  $\text{CHO}_2\text{Na}$  + 0.179  $\mu\text{g/mL}$  AuBtPD + 16 nmol/L  $\text{Apt}_{\text{Co}}$ ; b-g: a+0.033, 0.167, 0.333, 0.5, 0.667, 1 nmol/L  $\text{Co}^{2+}$ .

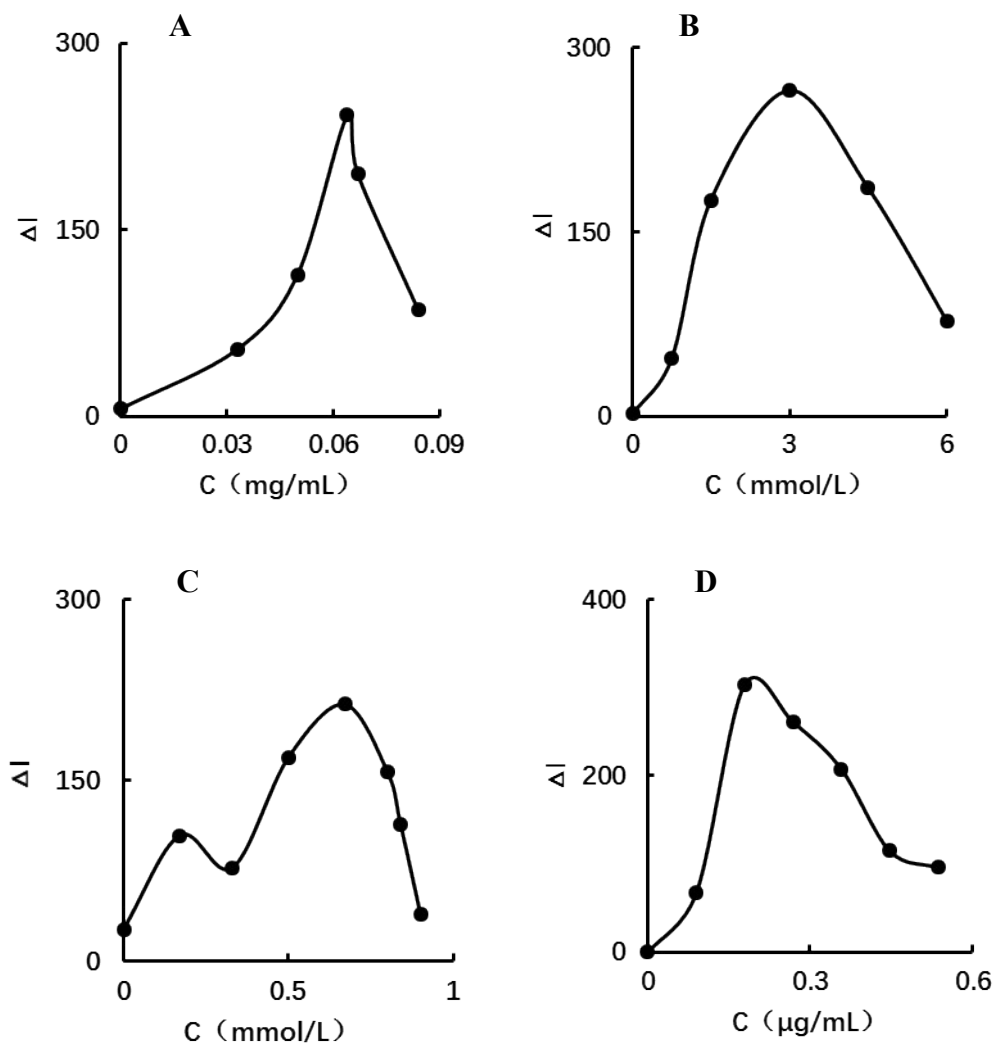

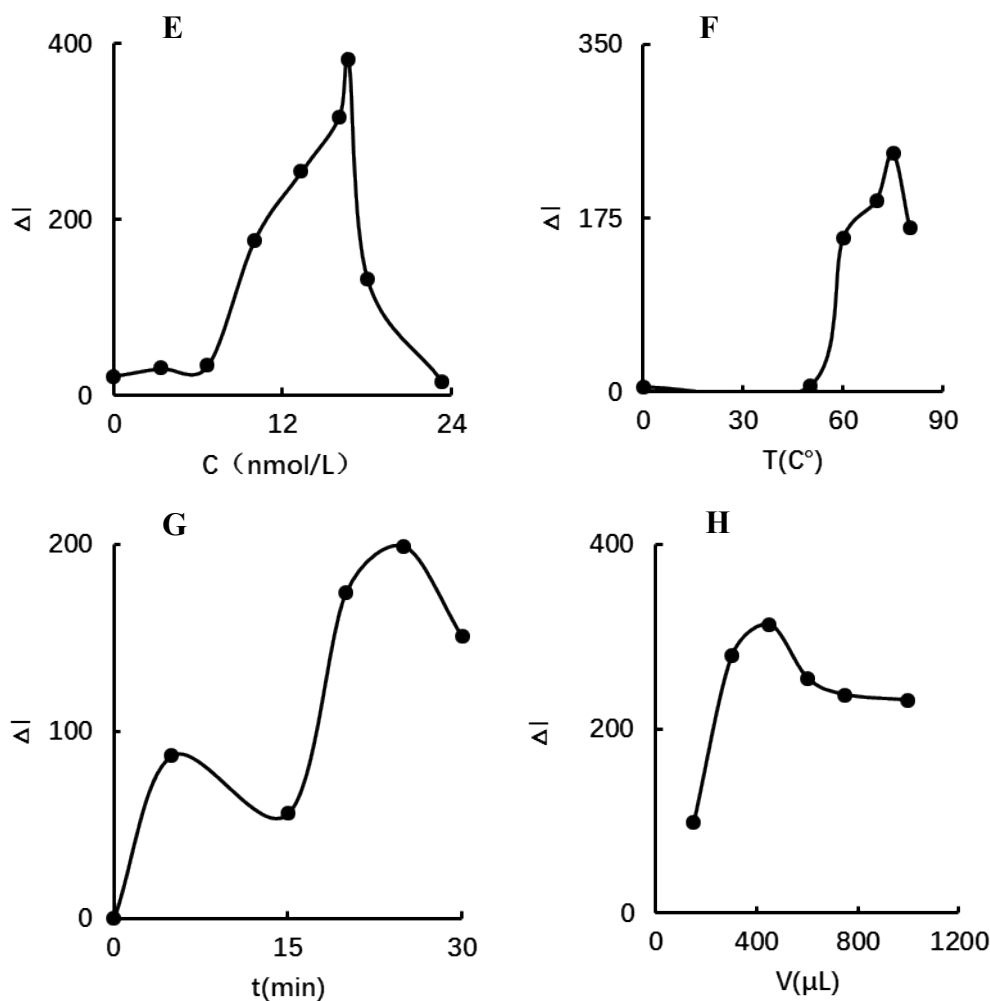

**Fig. S2 Conditions optimization**

- A:** HAuCl<sub>4</sub> concentration: HAuCl<sub>4</sub> + 0.67 mmol/L HCl + 3 mmol/L CHO<sub>2</sub>Na + 0.179 μg/mL AuBtPD + 16 nmol/L Apt<sub>Co</sub> + 0.667 nmol/L Co<sup>2+</sup>.
- B:** Influence of CHO<sub>2</sub>Na concentration: CHO<sub>2</sub>Na + 0.064 mg/mL HAuCl<sub>4</sub> + 0.67 mmol/L HCl + 0.179 μg/mL AuBtPD + 16 nmol/L Apt<sub>Co</sub> + 0.667 nmol/L Co<sup>2+</sup>.
- C:** Influence of HCl concentration: HCl + 0.064 mg/mL HAuCl<sub>4</sub> + 3 mmol/L CHO<sub>2</sub>Na + 0.179 μg/mL AuBtPD + 16 nmol/L Apt<sub>Co</sub> + 0.667 nmol/L Co<sup>2+</sup>.
- D:** Influence of AuBtPD concentration: AuBtPD + 0.064 mg/mL HAuCl<sub>4</sub> + 0.67 mmol/L HCl + 3 mmol/L CHO<sub>2</sub>Na + 16 nmol/L Apt<sub>Co</sub> + 0.667 nmol/L Co<sup>2+</sup>.
- E:** Influence of Apt<sub>Co</sub> concentration: apt<sub>Co</sub> + 0.064 mg/mL HAuCl<sub>4</sub> + 0.67 mmol/L HCl + 3 mmol/L CHO<sub>2</sub>Na + 0.179 μg/mL AuBtPD + 0.667 nmol/L Co<sup>2+</sup>.
- F:** Influence of water bath temperature: 0.064 mg/mL HAuCl<sub>4</sub> + 0.67 mmol/L HCl + 3 mmol/L CHO<sub>2</sub>Na + 0.179 μg/mL AuBtPD + 16 nmol/L Apt<sub>Co</sub> + 0.667 nmol/L Co<sup>2+</sup>.
- G:** Influence of water bath time: 0.064 mg/mL HAuCl<sub>4</sub> + 0.67 mmol/L HCl + 3 mmol/L CHO<sub>2</sub>Na + 0.179 μg/mL AuBtPD + 16 nmol/L Apt<sub>Co</sub> + 0.667 nmol/L Co<sup>2+</sup>.
- H:** Influence of the added volume of trisodium citrate: 0.064 mg/mL HAuCl<sub>4</sub> + 0.67 mmol/L HCl + 3 mmol/L CHO<sub>2</sub>Na + 0.179 μg/mL AuBtPD + 16 nmol/L Apt<sub>Co</sub> + 0.667 nmol/L Co<sup>2+</sup>.

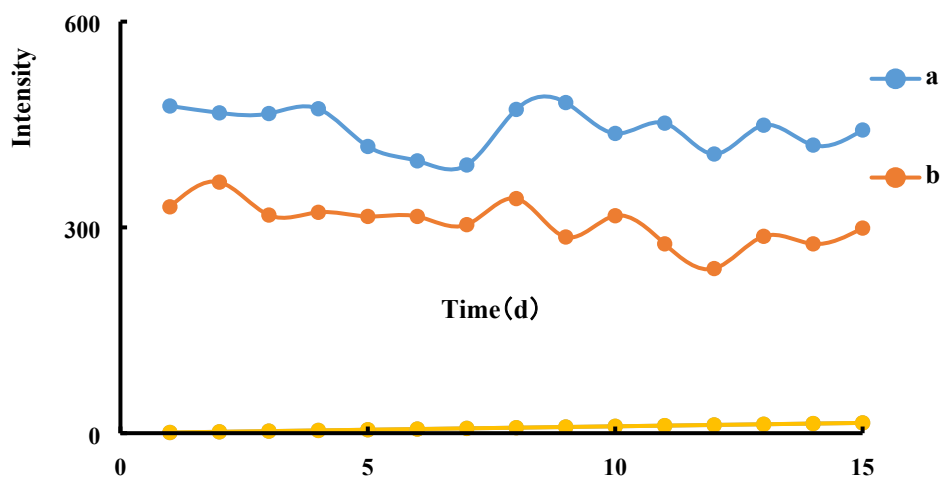

**Fig. S3 RRS intensity of COF**

**a:** 0.1 mg/mL AuBtPD ; **b:** 0.1 mg/mL BtPD.

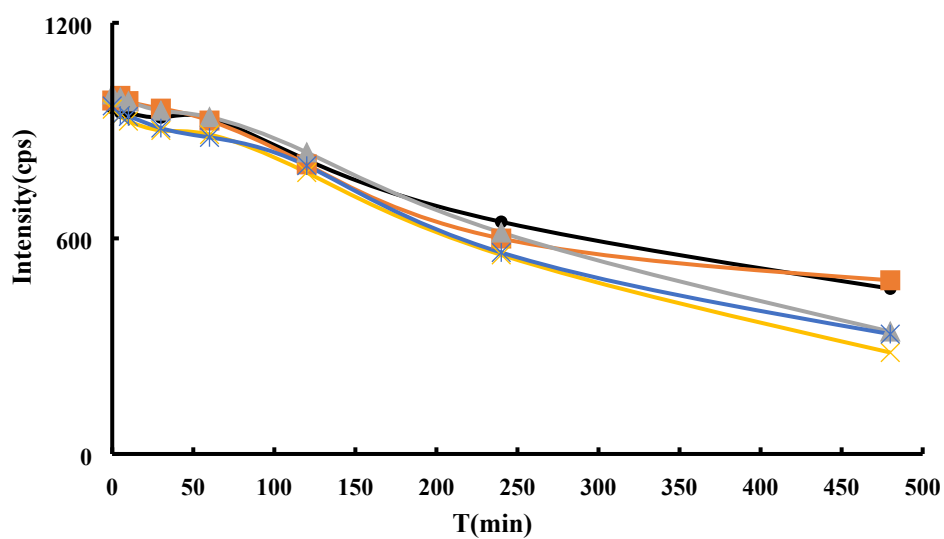

**Fig. S4 SERS Intensity of different batches**

0.064 mg/mL H<sub>AuCl</sub>4+ 0.67 mmol/L HCl + 3 mmol/L CHO<sub>2</sub>Na + 0.179 μg/mL AuBtPD + 16nmol/L Apt + 1 nmol/L Co<sup>2+</sup>.

**Table S1 FTIR peaks and the corresponding functional groups**

|                  | BtPD                       | AuBtPD                     |
|------------------|----------------------------|----------------------------|
| functional group | IR peak(cm <sup>-1</sup> ) | IR peak(cm <sup>-1</sup> ) |
| O-H              | 3367                       | 3247                       |
| C=N              | 1697                       | 1662                       |
| benzene ring     | 1622                       | 1574                       |
| C=C              | 1497                       | 1383                       |
| C-N              | 1346                       | 1270                       |
| C-C              | 1251、1149                  | 1077                       |
| C-H              | 971                        | 952                        |
| -NH <sub>2</sub> | 838                        | 836                        |

**Table S2 Influence of coexisting substances on SERS system**

| Coexisting substances         | Tolerance limit (times) | Relative error (%) | Coexisting substances        | Tolerance limit (times) | Relative error (%) |
|-------------------------------|-------------------------|--------------------|------------------------------|-------------------------|--------------------|
| K <sup>+</sup>                | 500                     | 5.6                | Ca <sup>2+</sup>             | 1000                    | -7.8               |
| Cl <sup>-</sup>               | 500                     | 6.3                | PO <sub>4</sub> <sup>-</sup> | 10                      | -3.3               |
| Fe <sup>3+</sup>              | 100                     | -8.7               | Al <sup>3+</sup>             | 10                      | -6.6               |
| Zn <sup>2+</sup>              | 1000                    | -2.4               | NH <sub>4</sub> <sup>+</sup> | 100                     | -5.1               |
| Cu <sup>2+</sup>              | 50                      | -3.2               | Cr <sup>3+</sup>             | 1000                    | 4.4                |
| Fe <sup>2+</sup>              | 1000                    | 6.4                | Hg <sup>2+</sup>             | 50                      | 7.2                |
| Mg <sup>2+</sup>              | 100                     | -4.6               | NO <sub>3</sub> <sup>-</sup> | 1000                    | 4.3                |
| Na <sup>+</sup>               | 1000                    | -8.4               | NO <sub>2</sub> <sup>-</sup> | 1000                    | 5.2                |
| SO <sub>4</sub> <sup>2-</sup> | 50                      | -6.1               | Ba <sup>2+</sup>             | 100                     | -6.9               |
| Pb <sup>2+</sup>              | 500                     | -5.8               | Cd <sup>2+</sup>             | 50                      | 7.6                |

**Table S3 Influence of coexisting substances on RRS system**

| Coexisting substances         | Tolerance limit (times) | Relative error (%) | Coexisting substances        | Tolerance limit (times) | Relative error (%) |
|-------------------------------|-------------------------|--------------------|------------------------------|-------------------------|--------------------|
| K <sup>+</sup>                | 500                     | 8.8                | Ca <sup>2+</sup>             | 1000                    | 2.3                |
| Cl <sup>-</sup>               | 500                     | 5.4                | PO <sub>4</sub> <sup>-</sup> | 10                      | -8.5               |
| Fe <sup>3+</sup>              | 500                     | -7.3               | Al <sup>3+</sup>             | 10                      | -8.7               |
| Zn <sup>2+</sup>              | 1000                    | -3.5               | NH <sub>4</sub> <sup>+</sup> | 500                     | -6.1               |
| Cu <sup>2+</sup>              | 50                      | -8.4               | Cr <sup>3+</sup>             | 1000                    | 3.3                |
| Fe <sup>2+</sup>              | 1000                    | 9.2                | Hg <sup>2+</sup>             | 50                      | 5.7                |
| Mg <sup>2+</sup>              | 100                     | 1.5                | NO <sub>3</sub> <sup>-</sup> | 1000                    | 6.3                |
| Na <sup>+</sup>               | 1000                    | -3.7               | NO <sub>2</sub> <sup>-</sup> | 1000                    | 1.6                |
| SO <sub>4</sub> <sup>2-</sup> | 50                      | -1.2               | Ba <sup>2+</sup>             | 100                     | -6.6               |
| Pb <sup>2+</sup>              | 500                     | -1.6               | Cd <sup>2+</sup>             | 100                     | 5.8                |

**Table S4 Results of RRS method**

| Sample      | Measurement value (nmol/L)        | Average (nmol/L) | Added Co <sup>2+</sup> (nmol/L) | Measurement value after adding (nmol/L) | recovery (%) | RSD (%) |
|-------------|-----------------------------------|------------------|---------------------------------|-----------------------------------------|--------------|---------|
| river water | 3.56, 3.40, 3.57, 3.81, 3.65      | 3.60             | 0.5                             | 4.13, 3.96, 4.34, 3.84, 4.39            | 106          | 4.14    |
| waste water | 15.04, 14.87, 15.34, 14.50, 14.72 | 14.89            | 0.5                             | 15.53, 15.56, 15.34, 15.10, 15.20       | 91           | 2.14    |
| tap water   | 1.27, 1.28, 1.06, 1.10, 1.17      | 1.18             | 0.5                             | 1.36, 1.84, 1.52, 1.84, 1.70            | 94           | 8.39    |

**Table S5 Results of SERS method**

| Sample      | Measurement value (nmol/L)        | Average (nmol/L) | Added Co <sup>2+</sup> (nmol/L) | Measurement value after adding (nmol/L) | recovery (%) | RSD (%) |
|-------------|-----------------------------------|------------------|---------------------------------|-----------------------------------------|--------------|---------|
| river water | 3.92, 3.55, 3.55, 3.74, 3.63      | 3.68             | 0.5                             | 4.24, 4.16, 4.16, 4.44, 3.92            | 101          | 4.24    |
| waste water | 15.50, 15.36, 14.25, 14.25, 14.62 | 14.79            | 0.5                             | 15.10, 15.60, 15.36, 15.24, 14.96       | 92           | 4.06    |
| tap water   | 1.25, 1.39, 1.10, 1.14, 1.24      | 1.22             | 0.5                             | 1.72, 1.72, 1.58, 1.86, 1.70            | 99           | 9.22    |
